# Supplementary material for: Predicting stop codon reassignment improves functional annotation of bacteriophages
Source: PubMed Central journal article supplement (PMC10769273; doi:10.1101/2023.12.19.572299), 2023-12-19
Supplement: NIHPP2023.12.19.572299v1-supplement-2.pdf [file NIHPP2023.12.19.572299v1-supplement-2.pdf]

## 227 **Supplementary Methods**

228

### 229 **Datasets**

230 A multifasta file of phage genomes was downloaded from INPHARED  
231 (<https://github.com/RyanCook94/inphared>; September 2023)<sup>6</sup>. Stop codon reassignment of  
232 INPHARED genomes was predicted using Prodigal-gv v2.11.0  
233 (<https://github.com/apcamargo/prodigal-gv>), a fork of Prodigal written to improve viral gene  
234 calling<sup>8</sup>. Those predicted to use translation table 4 or 15 were retained for downstream  
235 analysis.

236

237 The Unified Human Gut Virome Catalog (UHGV) was filtered for high quality and complete  
238 vOTUs deemed to be a “high confidence” virus and predicted to use either translation table  
239 4 or 15 (<https://github.com/snayfach/UHGV>). Stop codon reassignment had already been  
240 predicted for UHGV vOTUs using Prodigal-gv and is available in the UHGV metadata.

241

### 242 **Prokka**

243 A fork of Prokka v1.14.5<sup>11</sup> was written that incorporates an initial stage of ORF prediction  
244 using Prodigal-gv v2.11.0 (<https://github.com/apcamargo/prodigal-gv>)<sup>8</sup>. A first gene calling  
245 step is used to infer the genetic code most likely adopted by the genome, then the predicted  
246 genetic code is used to perform the translation FASTX::Seq, which we updated to accept  
247 code 15 ([metacpan.org/pod/FASTX::Seq](https://metacpan.org/pod/FASTX::Seq))<sup>16</sup>. The code for this is available at  
248 ([github.com/telatin/metaprokka](https://github.com/telatin/metaprokka)). We included publicly available HMMs of the PHROGs  
249 database in our Prokka-gv annotations  
250 ([http://s3.climb.ac.uk/ADM\\_share/all\\_phrogs.hmm.gz](http://s3.climb.ac.uk/ADM_share/all_phrogs.hmm.gz))<sup>17</sup>. The fork is installable from  
251 Bioconda as ‘metaprokka’.

252

### 253 **Pharokka**

254 Pharokka v1.5.0<sup>12</sup> was updated to include support for pyrodigal-gv implementing pyrodigal-  
255 gv as a gene predictor. This is specified by using ‘-g prodigal-gv’ when running Pharokka. The  
256 updated code is available on GitHub (<https://github.com/gbouras13/pharokka>). Pharokka  
257 uses tRNAscan-SE for predicting tRNAs<sup>14</sup>.

258

259 **Statistical Analyses and Data Visualisation**

260 To test for significance in differences of results, a simple paired T test was performed in R  
261 v4.2.2<sup>18</sup> and P-values were adjusted using the Benjamini-Hochberg procedure<sup>19</sup>. Figure 1 was  
262 produced using ggplot2 v3.4.2<sup>20</sup>.

263 **Supplementary Results**

264 **Prokka-gv Annotations**

265 For Prokka-gv, the largest differences were observed for sequences predicted to use  
266 translation table 15, for which Prokka-gv increased the median gene length (median of per  
267 genome medians) from 276 to 396 bp for UHGV sequences (43.5% increase), and from 309  
268 to 483 bp for INPHARED sequences (56.3% increase). This was also reflected in an increase  
269 of median coding capacity from 66.6% to 86.7% for UHGV, and from 69.2% to 87.3% for  
270 INPHARED. As it is commonly used as a phylogenetic marker for bacteriophages, we  
271 investigated how commonly the major capsid protein (MCP) could be identified with and  
272 without predicted stop codon reassignment<sup>15</sup>. For sequences predicted to use translation  
273 table 15, the MCP could be identified on 382/715 (53.4%) sequences with Prokka and this  
274 was marginally increased to 386/715 (53.9%) with Prokka-gv.

275

276 When investigating the sequences for which translation table 4 was predicted, a substantial  
277 increase was also observed for UHGV sequences, with Prokka-gv increasing median median  
278 gene length from 319 to 460 bp (44.2%), resulting in an increase of coding capacity from  
279 78.4% to 91.4%. However, the same was not observed for INPHARED sequences predicted to  
280 use translation table 4. These sequences observed a modest increase in median median  
281 gene length from 573 to 584 bp (1.8%) for Prokka-gv. Median coding capacity was not  
282 increased with Prokka and Prokka-gv both obtaining 86.2%.
